# Supplementary material
Source: ML conference proceedings conference paper supplement (https://openreview.net/forum?id=J9oefdGUuM)
Supplement: supplementary_material [file attachment]

## Supplementary Material Checklist

1. Submission introducing new datasets must include the following in the supplementary materials:
  - (a) Dataset documentation and intended uses. Recommended documentation frameworks include datasheets for datasets, dataset nutrition labels, data statements for NLP, and accountability frameworks. [Yes] In the Datasheets file
  - (b) URL to website/platform where the dataset/benchmark can be viewed and downloaded by the reviewers. [Yes] The data can be downloaded from a list of AWS s3 links. We put the download scripts in the zip file and show the command in README.md
  - (c) URL to Croissant metadata record documenting the dataset/benchmark available for viewing and downloading by the reviewers. You can create your Croissant metadata using e.g. the Python library available here: <https://github.com/mlcommons/croissant> [No]
  - (d) Author statement that they bear all responsibility in case of violation of rights, etc., and confirmation of the data license. [Yes] We bear all responsibility in case of violation of rights, etc., and confirmation of the data license.
  - (e) Hosting, licensing, and maintenance plan. The choice of hosting platform is yours, as long as you ensure access to the data (possibly through a curated interface) and will provide the necessary maintenance. [Yes] We will continually provide hosting, licensing, and maintenance.
2. To ensure accessibility, the supplementary materials for datasets must include the following:
  - (a) Links to access the dataset and its metadata. This can be hidden upon submission if the dataset is not yet publicly available but must be added in the camera-ready version. In select cases, e.g. when the data can only be released at a later date, this can be added afterward. Simulation environments should link to (open source) code repositories. [Yes] The data can be downloaded from a list of AWS s3 links. We put the download scripts in the zip file and show the command in README.md
  - (b) The dataset itself should ideally use an open and widely used data format. Provide a detailed explanation on how the dataset can be read. For simulation environments, use existing frameworks or explain how they can be used. [Yes] The data are contained in JSON files
  - (c) Long-term preservation: It must be clear that the dataset will be available for a long time, either by uploading to a data repository or by explaining how the authors themselves will ensure this. [Yes]
  - (d) Explicit license: Authors must choose a license, ideally a CC license for datasets, or an open source license for code (e.g. RL environments). [Yes] CC for data and Apache 2.0 for code.
  - (e) Add structured metadata to a dataset's meta-data page using Web standards (like schema.org and DCAT): This allows it to be discovered and organized by anyone. If you use an existing data repository, this is often done automatically. [Yes]
  - (f) Highly recommended: a persistent dereferenceable identifier (e.g. a DOI minted by a data repository or a prefix on identifiers.org) for datasets, or a code repository (e.g. GitHub, GitLab,...) for code. If this is not possible or useful, please explain why. [Yes] We will release it to GitHub after a reviewing process.
3. For benchmarks, the supplementary materials must ensure that all results are easily reproducible. Where possible, use a reproducibility framework such as the ML reproducibility checklist, or otherwise guarantee that all results can be easily reproduced, i.e. all necessary datasets, code, and evaluation procedures must be accessible and documented. [Yes]

49  
50

4. a brief discussion on the main concerns raised by previous reviewers and how you addressed them: [NA]
